# Supplementary material for: Redefinition of the Dinoflagellate GenusAlexandriumBased onCentrodinium: Reinstatement ofGessneriumandProtogonyaulax, andEpisemicolongen. nov. (Gonyaulacales, Dinophyceae)
Source: Hindawi journal article supplement (doi:10.1155/2019/1284104), 2019-12-31
Supplement: f4 [file 1284104.f4.ai]

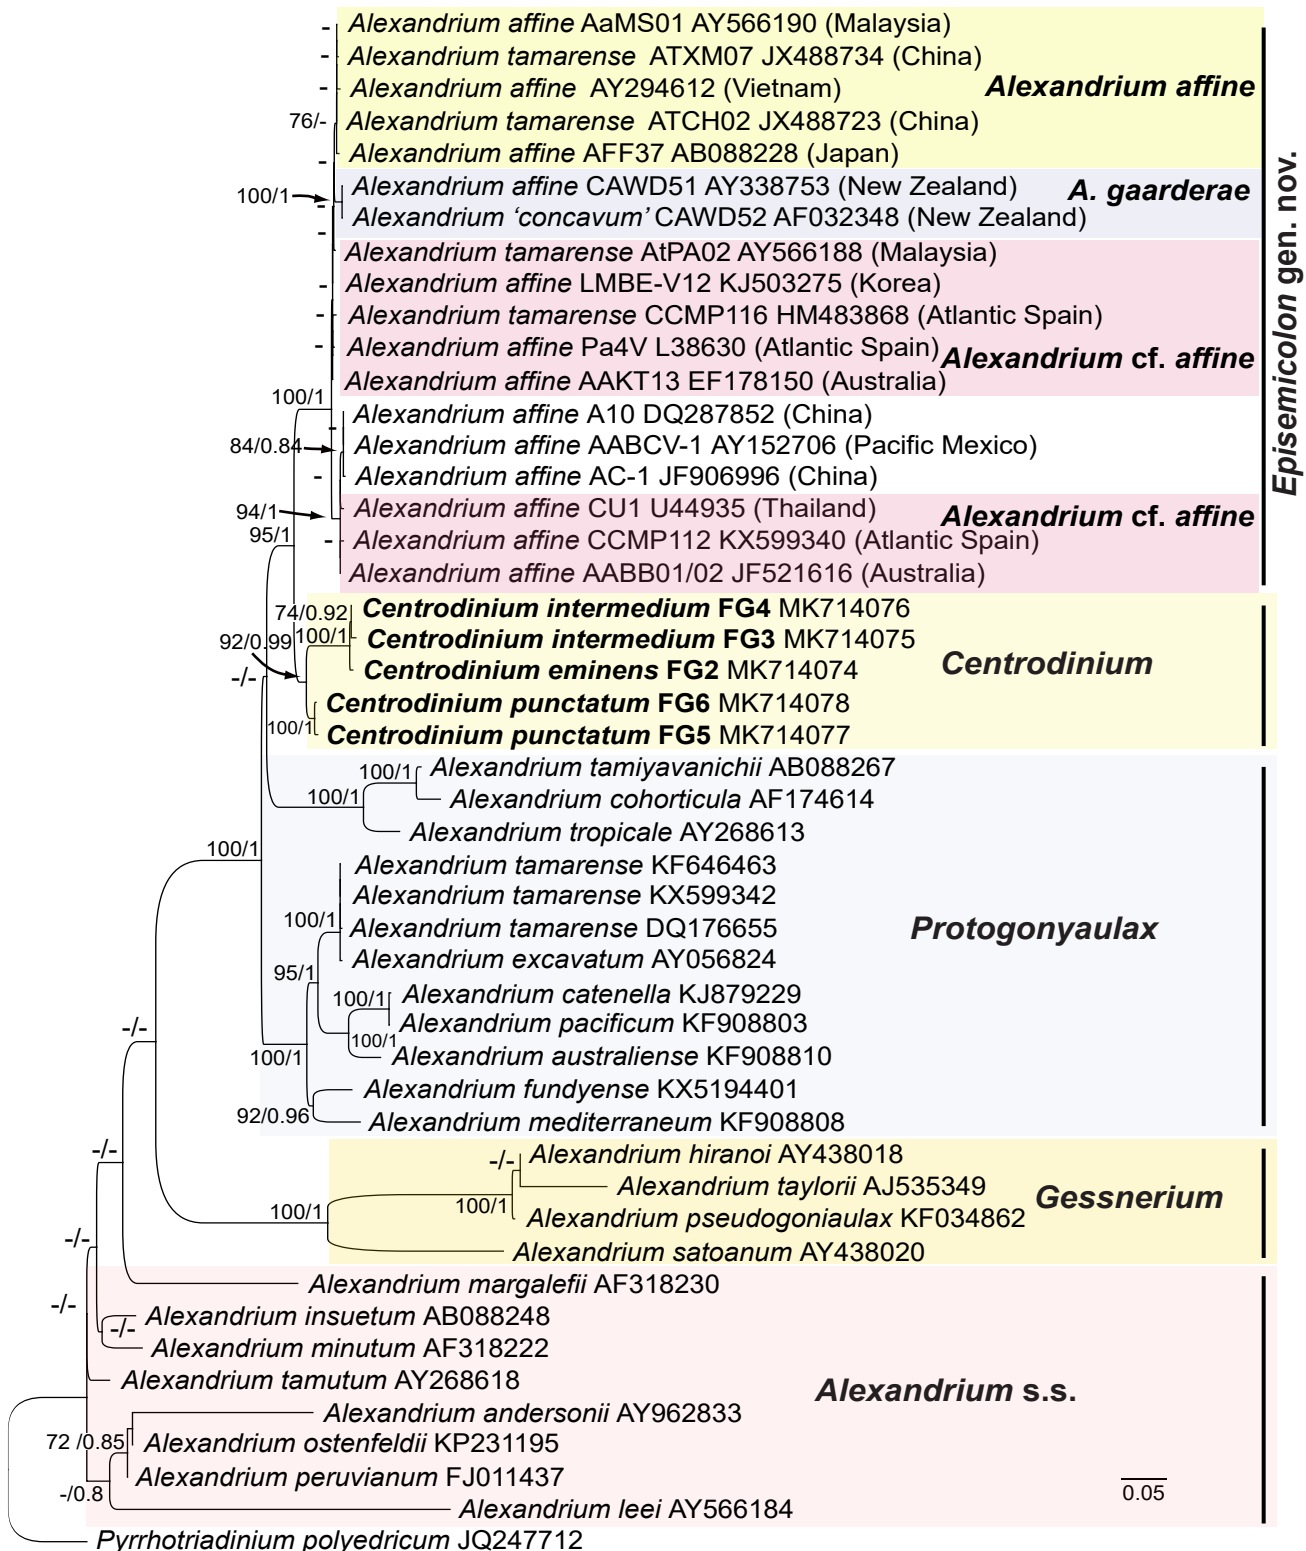

**Figure S1.** Maximum-likelihood phylogenetic tree of the D1–D2 domains of the LSU rRNA gene of selected species of *Alexandrium* sensu lato and *Centrodinium* spp. Supports at internal nodes are Bootstrap support (BP) >70 and Posterior Probability (PP) >0.8 are shown. *Pyrrhotriadinium polyedricum* was used as outgroup. New sequences are highlighted in bold. The scale bar represents the number of substitutions for a unit branch length.
